# Supplementary material for: Heat, salt, and volume transports in the eastern Eurasian Basin of the Arctic Ocean from 2 years of mooring observations
Source: Copernicus journal article supplement (doi:10.5194/os-14-1349-2018), 2018-11-02
Supplement: Supplementary file 1 [file os-14-1349-2018-supplement.pdf]

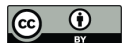

## *Supplement of*

# **Heat, salt, and volume transports in the eastern Eurasian Basin of the Arctic Ocean from 2 years of mooring observations**

**Andrey V. Pnyushkov et al.**

*Correspondence to:* Andrey V. Pnyushkov ([avpnyushkov@alaska.edu](mailto:avpnyushkov@alaska.edu))

The copyright of individual parts of the supplement might differ from the CC BY 4.0 License.

Supplementary materials

Introduction

The following supporting information includes a figure to illustrate heat transport at the Laptev Sea slope calculated using the lowest water temperature observed at NABOS moorings in 2013–15 as the reference temperature.

5

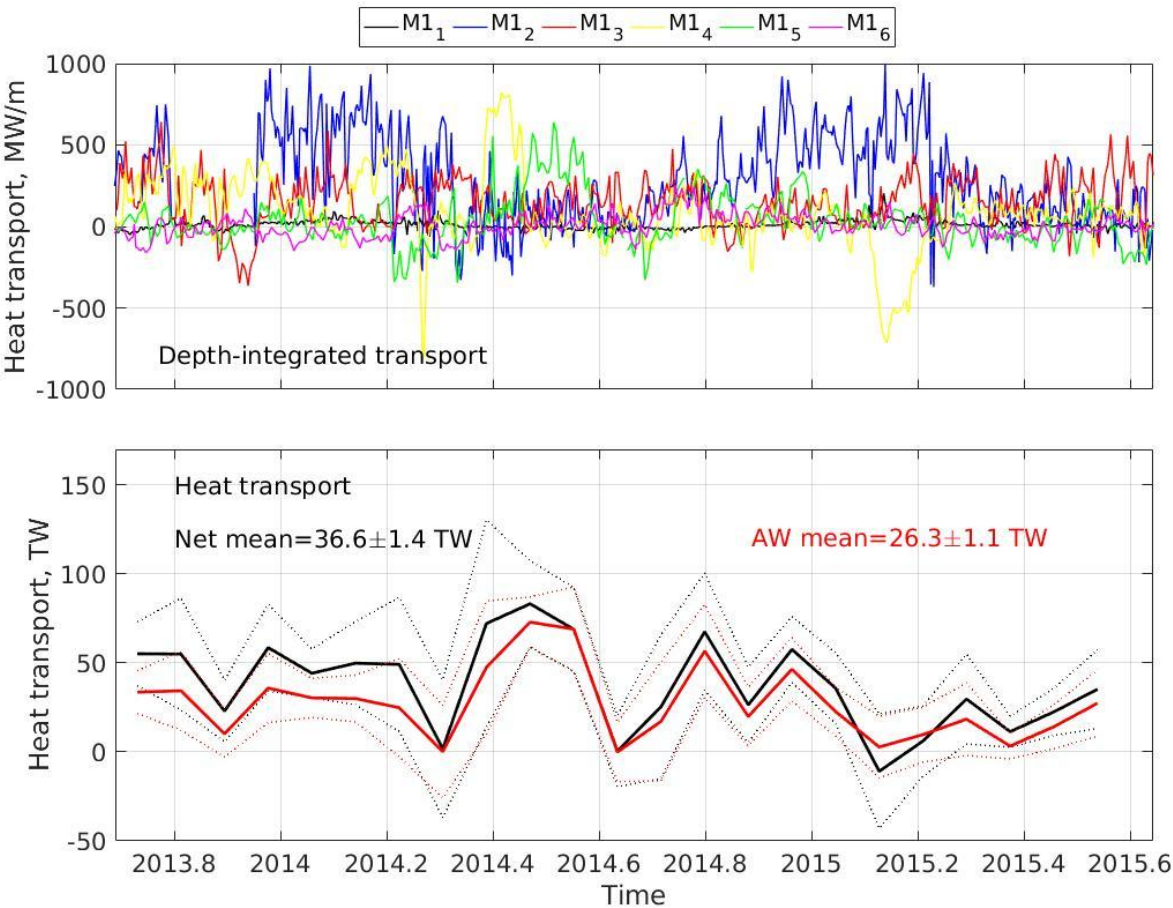

Figure S1: (a) Depth-integrated heat transports in the layer spanned by 2013–15 CTD and velocity observations at six moorings at the Laptev Sea slope; (b) monthly net heat transport in the upper 780-m layer (black) and in the AW layer (red) across the 125°E section calculated using the reference temperature of -1.3 °C (the lowest water temperature observed at NABOS moorings in 2013–15). Dotted lines show one standard deviation intervals.
